# Supplementary material
Source: PubMed Central journal article supplement (PMC2788880)
Supplement: supp_M109.025080_jbc.M109.025080-1.pdf [file supp_M109.025080_jbc.M109.025080-1.pdf]

## Supplemental materials

### Supplement TABLE 1

#### Experimental restraints and structural statistics of the 30 NMR structures

---

|                                                                       |                 |
|-----------------------------------------------------------------------|-----------------|
| Number of NOE cross-peaks found                                       | 2249            |
| Number of NOE cross-peaks assigned                                    | 2198            |
| Number of experimental restraints                                     |                 |
| Upper distance restraints from NOE                                    |                 |
| Total                                                                 | 1022            |
| Short range                                                           | 474             |
| Medium range                                                          | 294             |
| Long range                                                            | 254             |
| Residual dipolar coupling restraints (H-N)                            | 89              |
| Dihedral angle restraints (TALOS)                                     | 159             |
| Hydrogen bond distance restraints                                     | 70              |
| Ca <sup>2+</sup> -ligand distance restraints                          | 12              |
| Average r.m.s.d. values from experimental data                        |                 |
| Distance restraint violation (Å)                                      | 0.052 ± 0.004   |
| Dihedral angle restraint violation                                    | 0.323° ± 0.188° |
| RDC restraint violation (Hz)                                          | 0.058 ± 0.016   |
| Average r.m.s.d. values from idealized covalent geometry              |                 |
| Bonds (Å)                                                             | 0.0030 ± 0.0006 |
| Angles                                                                | 0.409° ± 0.021° |
| Impropers                                                             | 0.343° ± 0.020° |
| PROCHECK Ramachandran analysis for the folded region (residues 80-89) |                 |
| Residues in favored regions (%)                                       | 94.1            |
| Residues in additional allowed regions (%)                            | 5.9             |
| Residues in generously allowed regions (%)                            | 0.0             |
| Residues in disallowed regions (%)                                    | 0.0             |
| Coordinate precision of folded regions (residues 80-163)              |                 |
| Backbone (Å)                                                          | 0.51 ± 0.08     |
| All heavy atoms (Å)                                                   | 1.06 ± 0.09     |

---

**Supplement TABLE 2****Rotational diffusion parameters for sCaM4-MKP1 and sCaM4ct-MKP1<sup>a</sup>**

|              |                           | N-lobe (1-77) <sup>b</sup> | C-lobe (78-149) | C-lobe+MKP1 (78-166) |
|--------------|---------------------------|----------------------------|-----------------|----------------------|
| sCaM4-MKP1   | N                         | 43                         | 49              | 56                   |
|              | $\tau_m^c$                | $8.73 \pm 0.01$            | $8.98 \pm 0.01$ | $9.04 \pm 0.01$      |
|              | $D_{\parallel}/D_{\perp}$ | $1.39 \pm 0.01$            | $1.30 \pm 0.01$ | $1.30 \pm 0.01$      |
|              | $\chi^2$ (red)            | 13.80                      | 24.40           | 31.15                |
| sCaM4ct-MKP1 | N                         | —                          | 55              | 66                   |
|              | $\tau_m$                  | —                          | $6.03 \pm 0.01$ | $6.02 \pm 0.01$      |
|              | $D_{\parallel}/D_{\perp}$ | —                          | $1.12 \pm 0.01$ | $1.13 \pm 0.01$      |
|              | $\chi^2$ (red)            | —                          | 18.85           | 18.00                |

<sup>a</sup> All values were obtained by fitting to the axially symmetric model.

<sup>b</sup> The solution structure of the N-terminal domain of Ca<sup>2+</sup>-sCaM4 (PDB code: 2roa) was used for the fitting.

<sup>c</sup> The correlation time of molecular tumbling was calculated as  $\tau_m = (6D_{iso})^{-1}$ ;  $D_{iso} = 1/3 D_{\parallel} + 2/3 D_{\perp}$ .

**Supplement TABLE 3****Summary of structural comparison to other CaM-target peptide complexes**

| Structure (PDB entry) | Backbone rmsd <sup>a</sup> | Difference in peptide angle <sup>b</sup> |
|-----------------------|----------------------------|------------------------------------------|
| RYR1 (2BCX)           | 0.84 Å                     | 32.6° (3617-3638) <sup>c</sup>           |
| smMLCK (1CDL)         | 0.84 Å                     | 33.2° (798-813)                          |
| CaMKII (1CDM)         | 0.80 Å                     | 32.2° (295-309)                          |
| CaMKI (1MXE)          | 0.74 Å                     | 26.9° (298-317)                          |
| eNOS (1NIW)           | 0.90 Å                     | 25.2° (496-506)                          |
| NMDAR (2HQW)          | 0.91 Å                     | 34.2° (877-892)                          |

<sup>a</sup> Calculated for the well-folded region (residues 85-145).

<sup>b</sup> Calculated when the protein backbone atoms (residues 85-145) were superposed. The  $\alpha$ -helical region of the MKP1 domain (residues 156-163) was used for the calculation.

<sup>c</sup> The  $\alpha$ -helical region of the peptide used for the calculation.
